# Supplementary material for: Changes in Office Blood Pressure Control, Augmentation Index, and Liver Steatosis in Kidney Transplant Patients after Successful Hepatitis C Infection Treatment with Direct Antiviral Agents
Source: MDPI journal article supplement (doi:10.3390/jcm9040948), 2020-03-30
Supplement: s1 [file s1]

**Supplementary Table S1.** Laboratory parameters before and after successful DAA therapy, divided into subgroups based on changes in OBP control after treatment.

|                                       | OBP control improvement (N = 14) |                 |                 | <i>p</i> | No OBP control improvement (N = 14) |                 |                 | <i>p</i> |
|---------------------------------------|----------------------------------|-----------------|-----------------|----------|-------------------------------------|-----------------|-----------------|----------|
|                                       | Baseline                         | Follow-up       | Δ               |          | Baseline                            | Follow-up       | Δ               |          |
| TC [mmol/l mean and 95% CI]           | 5.2 (4.8–5.6)                    | 5.3 (4.8–5.9)   | 0.1 (–0.3–0.6)  | 0.74     | 4.7 (4.0–5.4)                       | 5.1 (4.4–5.8)   | 0.4 (–0.2–1.1)  | 0.35     |
| TG [mmol/l, mean and 95% CI]          | 1.5 (1.2–1.8)                    | 1.4 (1.2–1.7)   | –0.1 (–0.3–0.2) | 0.63     | 1.6 (1.2–2.0)                       | 1.5 (1.1–1.8)   | –0.1 (–0.5–0.2) | 0.61     |
| Insulin [mU/l, median and IQR] *      | 9.0 (7.5–22.3)                   | 10.8 (8.0–13.8) | –0.0 (–2.4–1.1) | 0.35     | 11.5 (8.7–19.9)                     | 12.1 (7.1–19.4) | –0.5 (–1.9–1.0) | 0.55     |
| HbA <sub>1c</sub> [% ,median and IQR] | 5.4 (5.1–6.1)                    | 5.7 (5.6–6.0)   | 0.2 (–0.4–0.4)  | 0.89     | 5.7 (5.3–6.9)                       | 5.4 (5.1–6.5)   | –0.4 (–0.8–0.3) | 0.24     |
| HOMA-IR [median and IQR]              | 2.4 (1.7–5.0)                    | 2.7 (2.2–3.2)   | 0.1 (–1.4–0.4)  | 0.83     | 2.6 (1.9–4.7)                       | 2.9 (1.4–4.8)   | –0.3 (–0.5–0.4) | 0.70     |

CI, confidence interval; IQR, interquartile range; TC, total cholesterol; TG, triglycerides; HbA<sub>1c</sub>, glycated hemoglobin; HOMA-IR, insulin resistance as estimated by the homeostasis model assessment. For all comparisons of baseline values between two study subgroups, *p* values were >0.05.

**Supplementary Table S2.** The results of liver function tests as well as the measurements of liver stiffness (LSM) and liver steatosis (controlled attenuation parameter – CAP) in kidney transplant recipients before and after the successful DAA therapy, divided into 2 subgroups based on the changes in OBP control after treatment.

|                                                  | OBP control improvement (N = 14) |                  |                   | <i>p</i> | No OBP control improvement (N = 14) |                  |                    | <i>p</i> |
|--------------------------------------------------|----------------------------------|------------------|-------------------|----------|-------------------------------------|------------------|--------------------|----------|
|                                                  | Baseline                         | Follow-up        | Δ                 |          | Baseline                            | Follow-up        | Δ                  |          |
| <b>Liver function tests</b>                      |                                  |                  |                   |          |                                     |                  |                    |          |
| AST [IU/l, median and IQR]                       | 41.5 (24.0–56.0)                 | 17.0 (15.0–24.0) | –21.5 (–32.0–9.0) | <0.01    | 33.0 (20.0–43.0)                    | 19.0 (10.0–22.0) | –11.0 (–22.0–9.0)  | <0.01    |
| ALT [IU/l, median and IQR]*                      | 41.0 (26.0–80.0)                 | 16.5 (10.0–20.0) | –28.5 (–39.0–7.0) | <0.01    | 32.0 (22.0–51.0)                    | 16.0 (10.0–23.0) | –16.0 (–21.0–9.0)  | <0.01    |
| GGT [IU/l, median and IQR]                       | 38.0 (19.0–70.0)                 | 19.5 (14.0–27.0) | –16.5 (–26.0–1.0) | <0.05    | 37.5 (29.0–79.0)                    | 19.5 (13.0–39.0) | –21.0 (–44.0–14.0) | <0.01    |
| TB [mg/dl, mean and 95% CI]                      | 1.0 (0.8–1.2)                    | 0.9 (0.7–1.1)    | –0.1 (–0.3–0.1)   | 0.64     | 0.9 (0.7–1.0)                       | 0.8 (0.6–0.9)    | –0.1 (–0.3–0.1)    | 0.39     |
| <b>Liver stiffness and steatosis assessments</b> |                                  |                  |                   |          |                                     |                  |                    |          |
| LSM [kPa, median and IQR ]                       | 6.7 (5.4–9.6)                    | 6.6 (5.8–9.2)    | –0/5 (–0.6–1.2)   | 0.81     | 7.4 (6.1–11.5)                      | 7.2 (5.6–9.0)    | –0.9 (–2.3–0.9)    | 0.22     |
| CAP [dB/m, mean and 95% CI]                      | 241 (209–274)                    | 209 (191–227)    | –32 (–63–1)       | <0.05    | 221 (192–249)                       | 216 (196–236)    | –5 (–30–25)        | 0.63     |

CI, confidence interval; IQR, interquartile range; BP, office blood pressure; AST, aspartate aminotransferase; ALT, alanine aminotransferase; GGT, gammaglutamyltranspeptidase; TB, total bilirubin; LSM, liver stiffness measurement; CAP, controlled attenuation parameter. For all comparisons of baseline values between two study subgroups, *p* values were >0.05.
